# Supplementary material for: Analysis of Tumor Angiogenesis and Immune Microenvironment in Non-Functional Pituitary Endocrine Tumors
Source: PubMed Central journal article supplement (PMC6572068; doi:10.3390/jcm8050695), 2019-05-16
Supplement: jcm-08-00695-s001.pdf [file jcm-08-00695-s001.pdf]

# Analysis of Tumor Angiogenesis and Immune Microenvironment in Non-Functional Pituitary Endocrine Tumors

Mizuto Sato, Ryota Tamura, Haruka Tamura, Taro Mase, Kenzo Kosugi, Yukina Morimoto, Kazunari Yoshida and Masahiro Toda \*

## Supplementary Figure 1

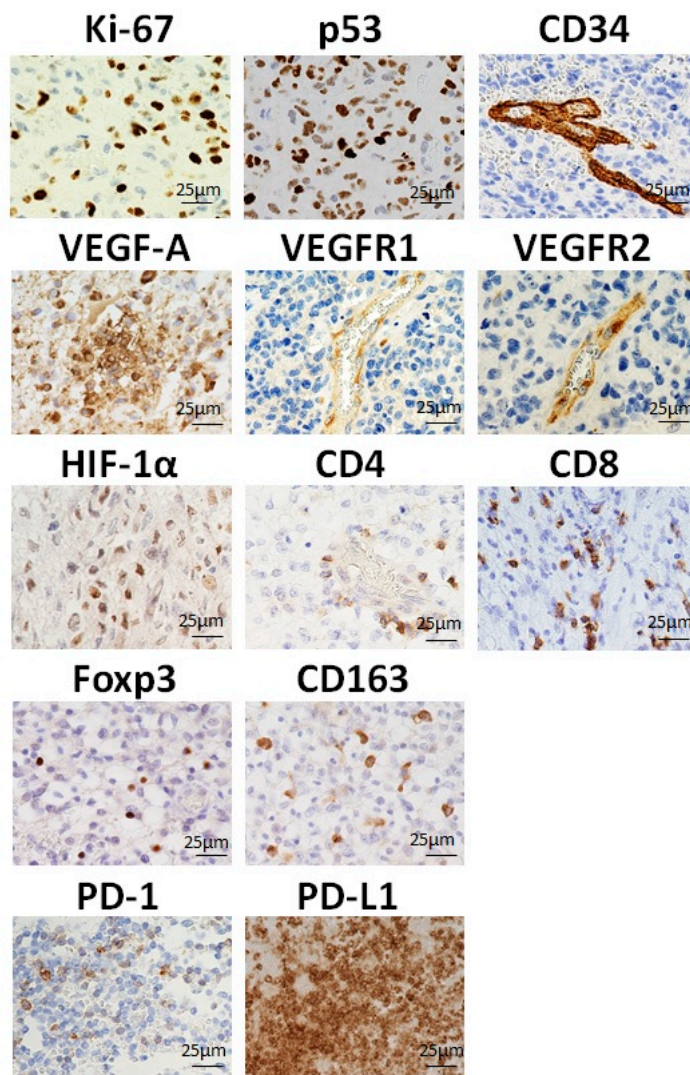

Figure S1. Positive controls for each antibody.
